# Supplementary material
Source: PubMed Central journal article supplement (PMC6520219)
Supplement: NIHMS1503648-supplement-4.pdf [file NIHMS1503648-supplement-4.pdf]

**a** SZ/SZA (motion-related connections included)

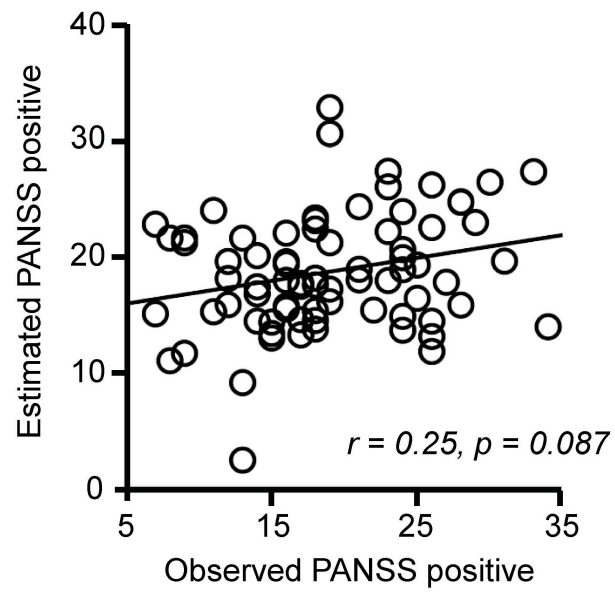

**b** SZ/SZA: PANSS positive vs. PANSS negative

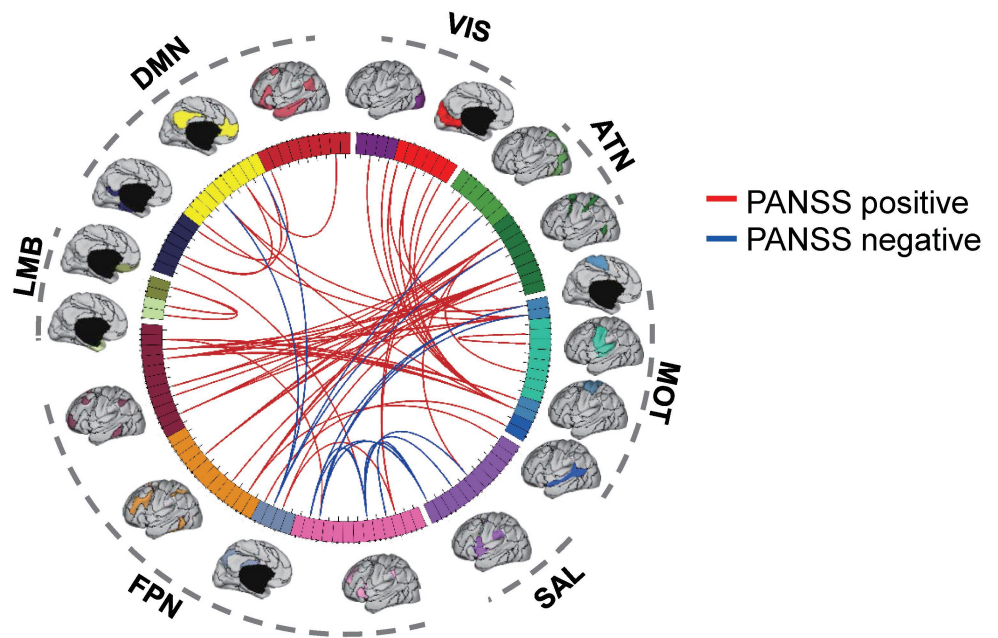

Supplementary Fig. S4
