# Supplementary material
Source: PubMed Central journal article supplement (PMC6520219)
Supplement: NIHMS1503648-supplement-6.pdf [file NIHMS1503648-supplement-6.pdf]

a

PANSS positive: SZ/SZA vs. BP

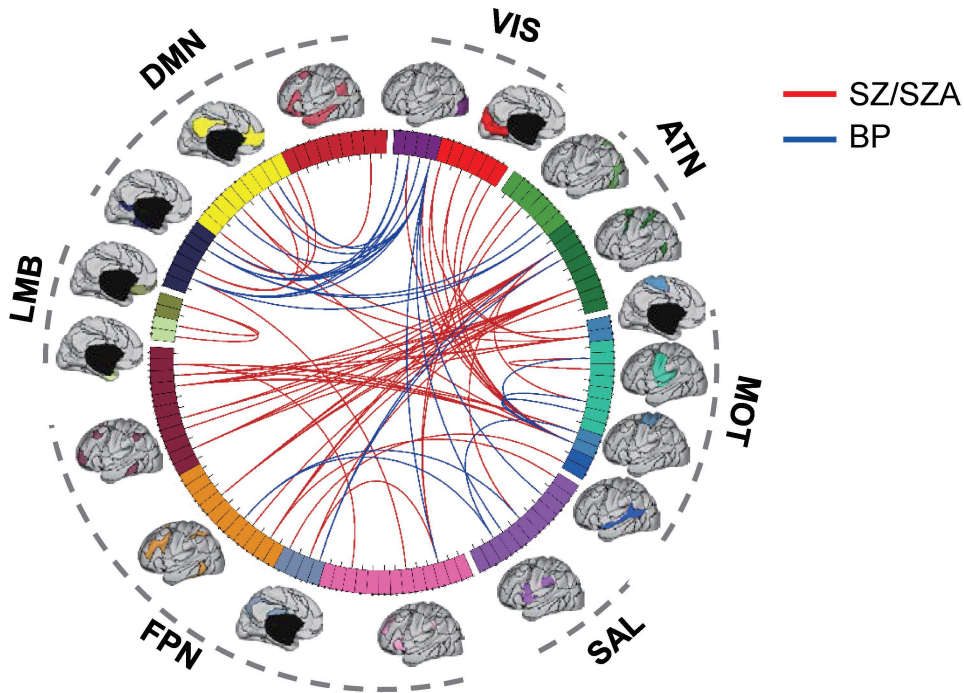

b

Estimating PANSS positive scores using all patients

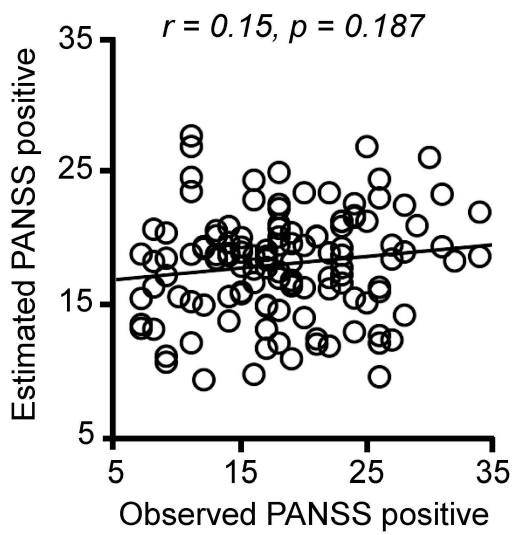

c

Estimating PANSS negative scores using all patients

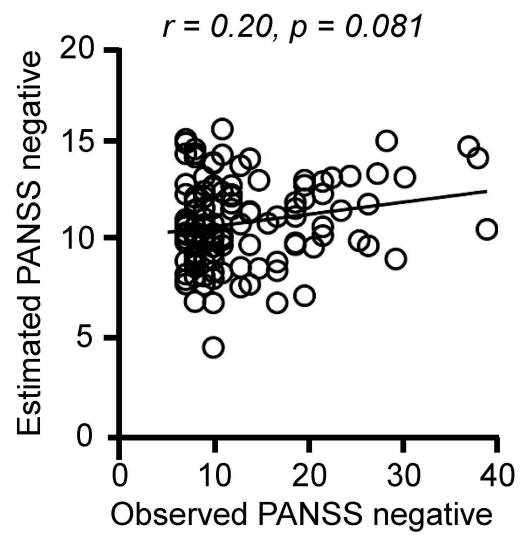

Supplementary Fig. S6
