# Supplementary material
Source: PubMed Central journal article supplement (PMC6520219)

**a** Estimating positive symptoms in SZ/SZA patients

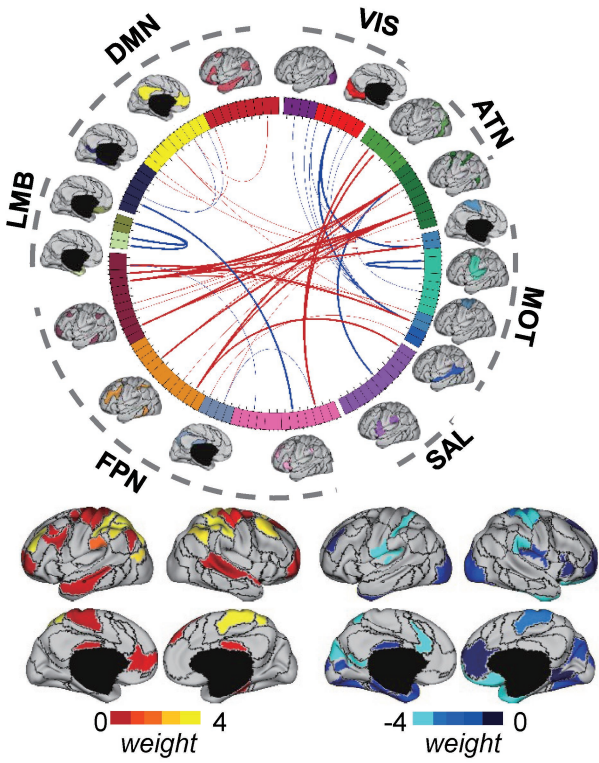

**b** Estimating negative symptoms in SZ/SZA patients

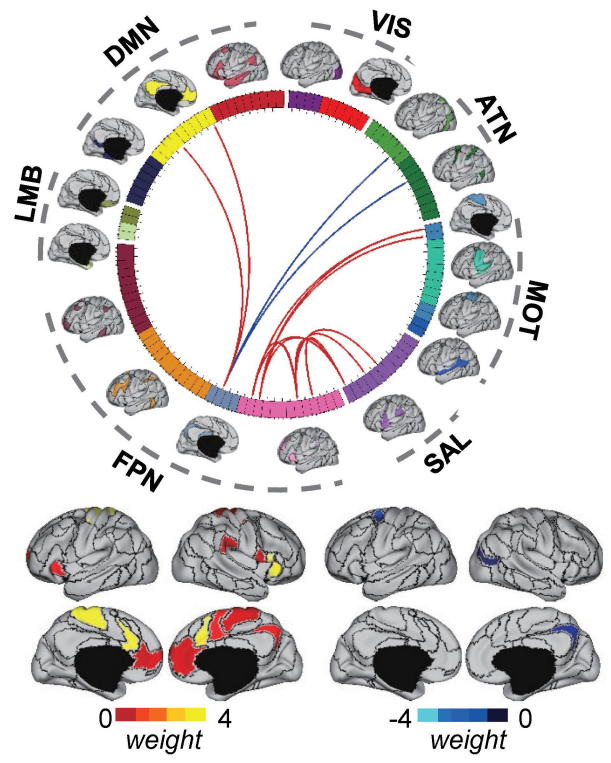

**c** Estimating positive symptoms in BP patients

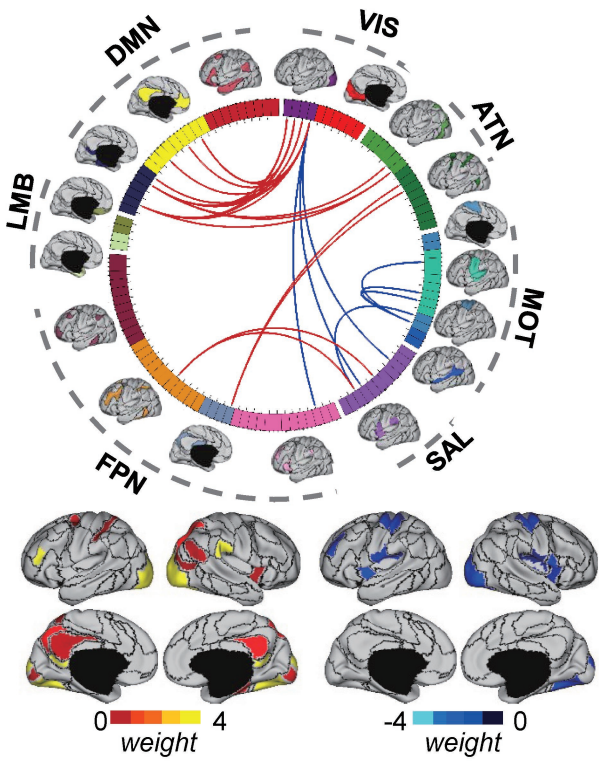

**d** Estimating mania scores in BP patients

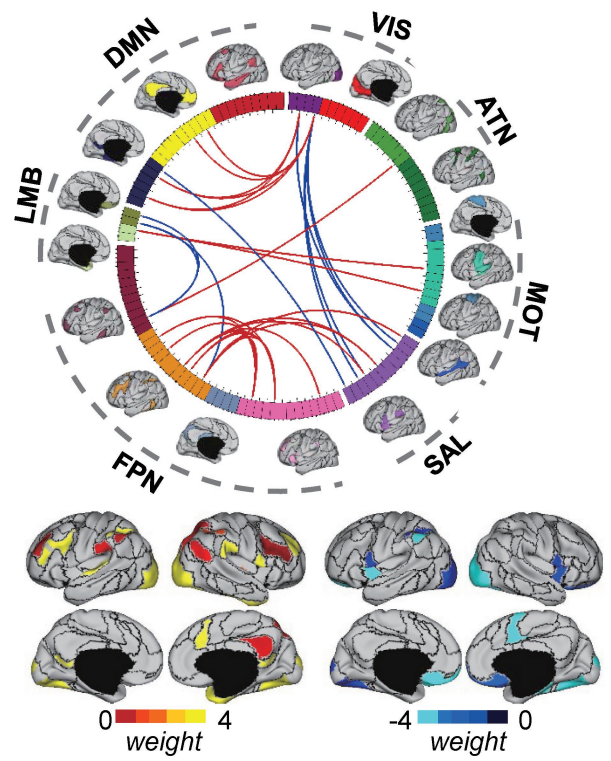

Supplement: NIHMS1503648-supplement-8.pdf [file NIHMS1503648-supplement-8.pdf]
