# Supplementary material
Source: PubMed Central journal article supplement (PMC6520219)

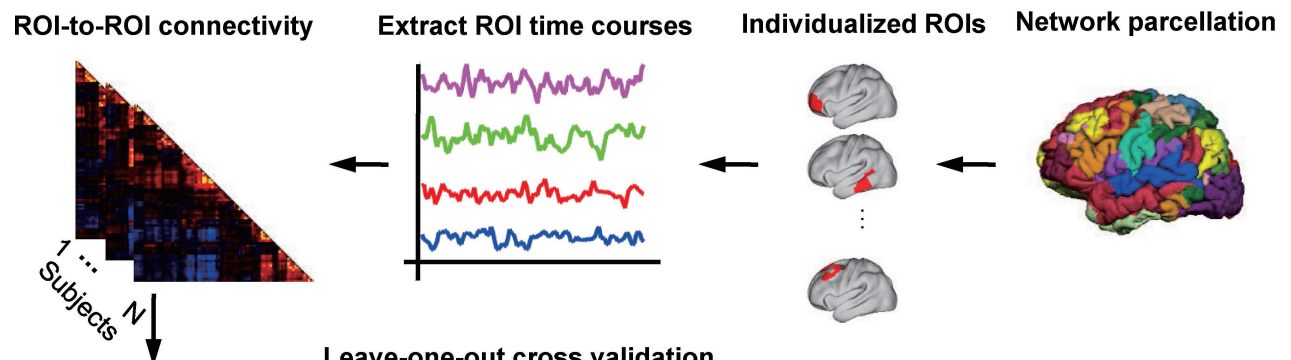

Leave-one-out cross validation

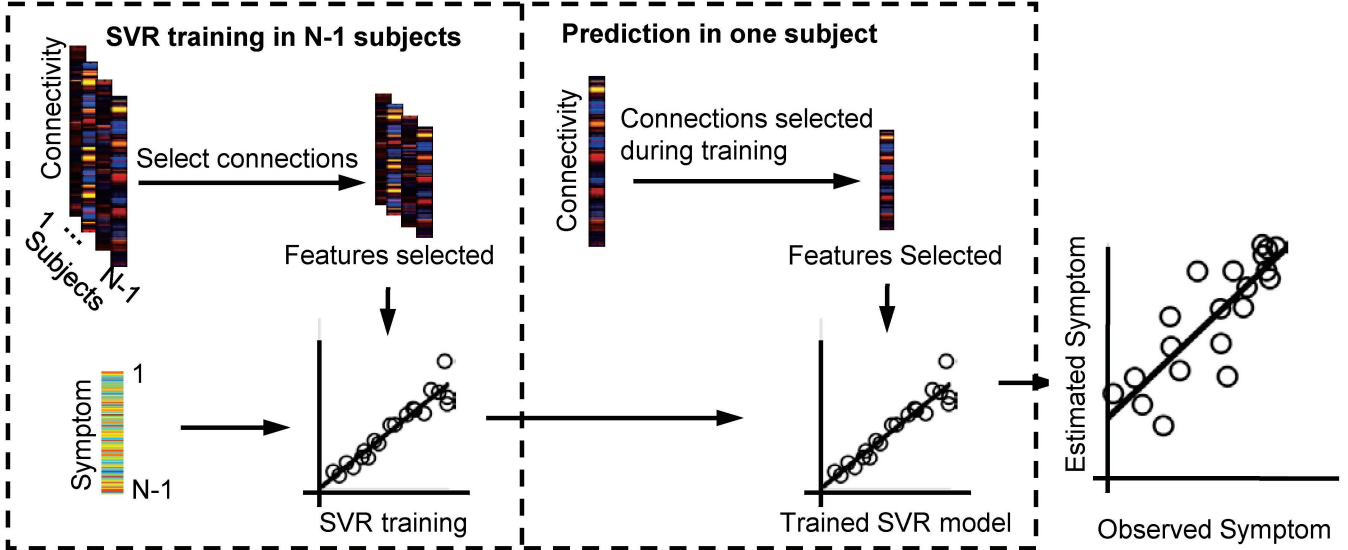

Supplementary Fig. S1

Supplement: NIHMS1503648-supplement-1.pdf [file NIHMS1503648-supplement-1.pdf]

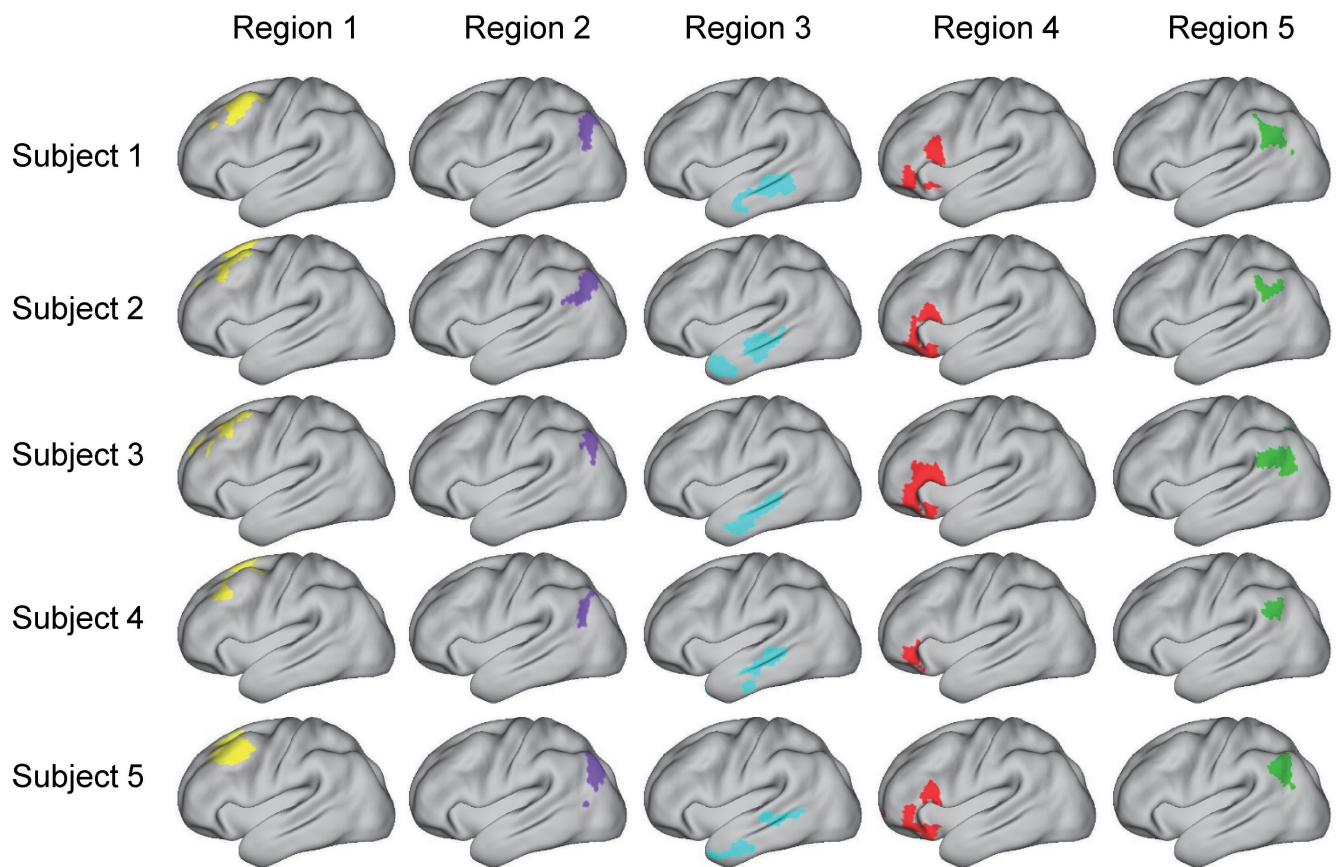

Supplementary Fig. S2

Supplement: NIHMS1503648-supplement-2.pdf [file NIHMS1503648-supplement-2.pdf]

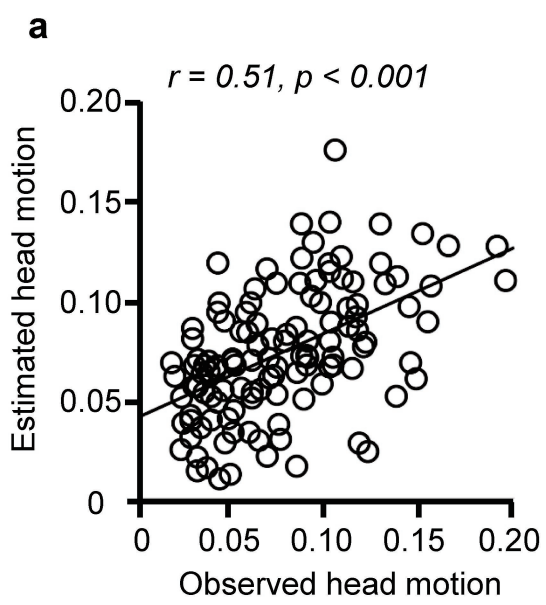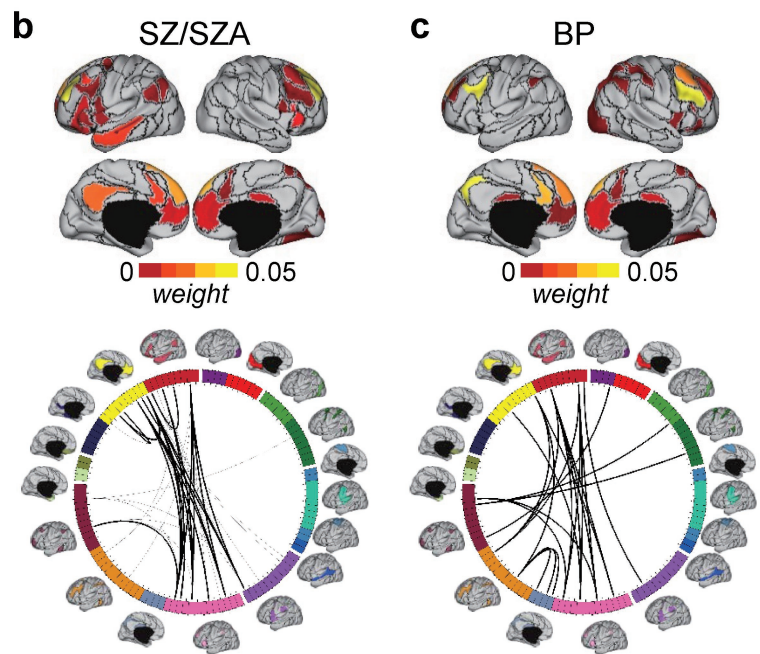

Supplementary Fig. S3

Supplement: NIHMS1503648-supplement-3.pdf [file NIHMS1503648-supplement-3.pdf]

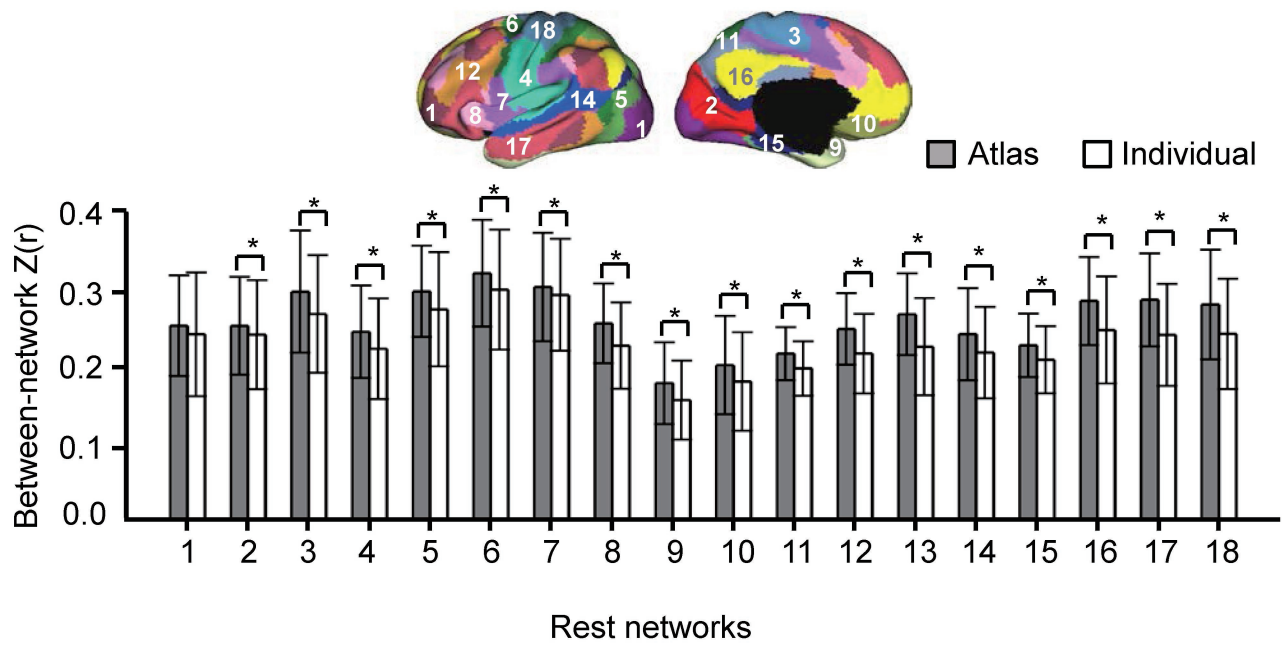

Supplementary Fig. S5

Supplement: NIHMS1503648-supplement-5.pdf [file NIHMS1503648-supplement-5.pdf]

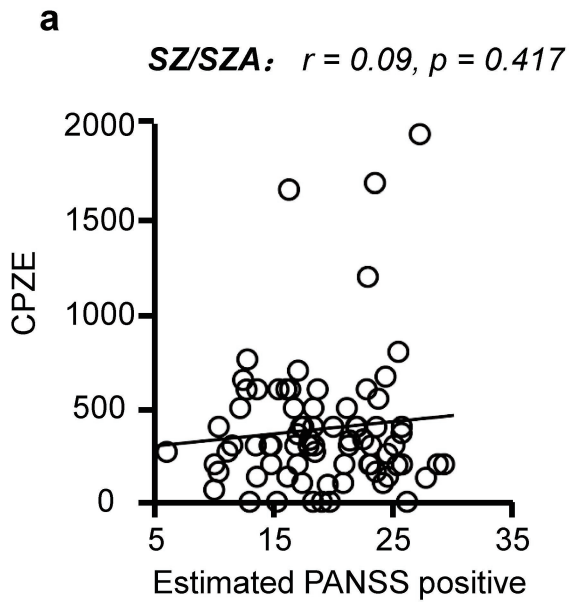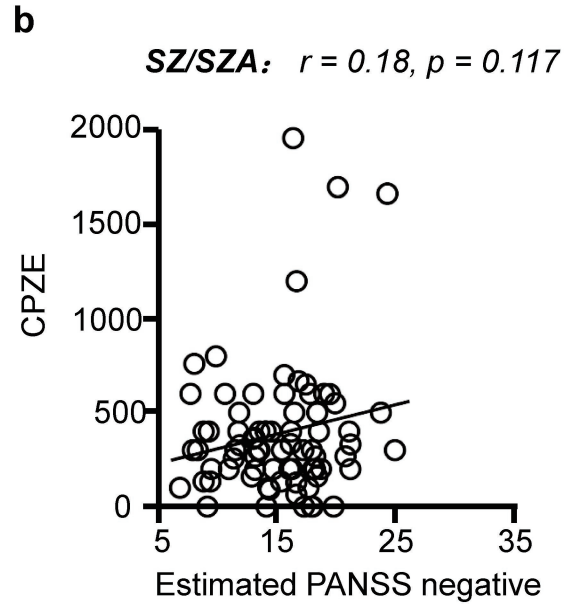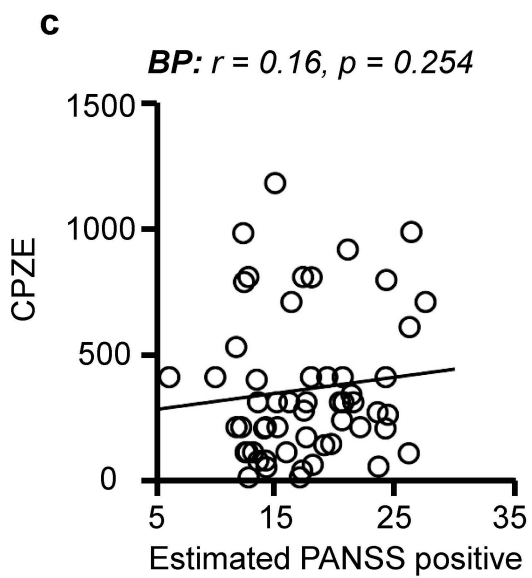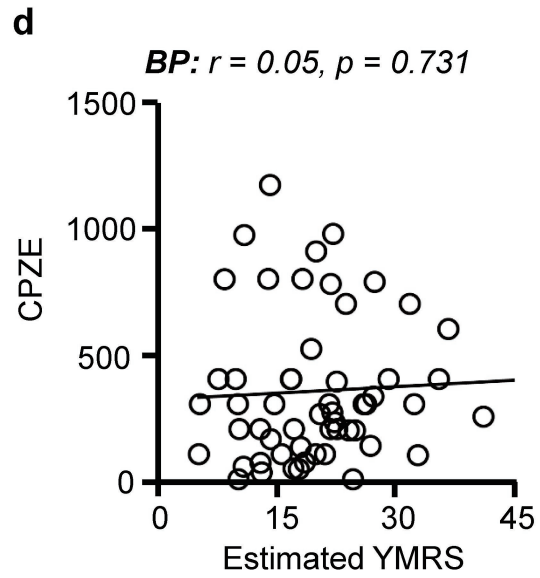

Supplementary Fig. S7

Supplement: NIHMS1503648-supplement-7.pdf [file NIHMS1503648-supplement-7.pdf]

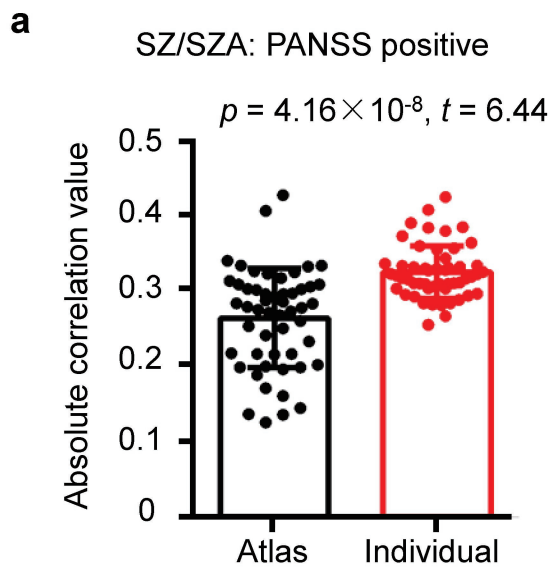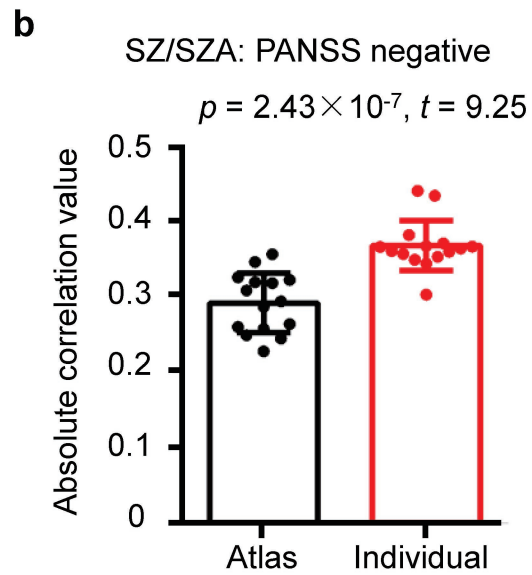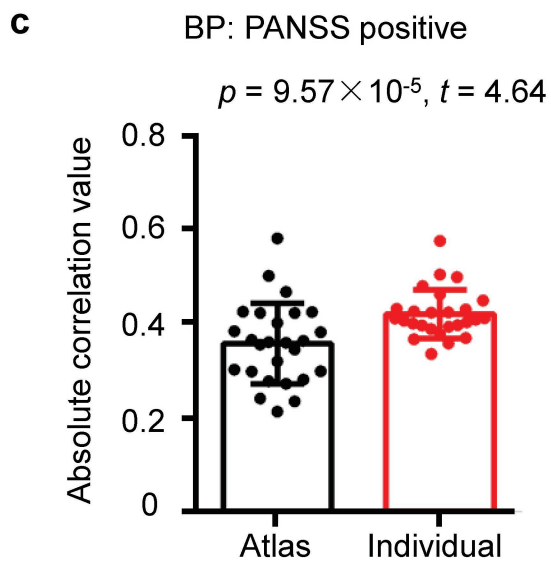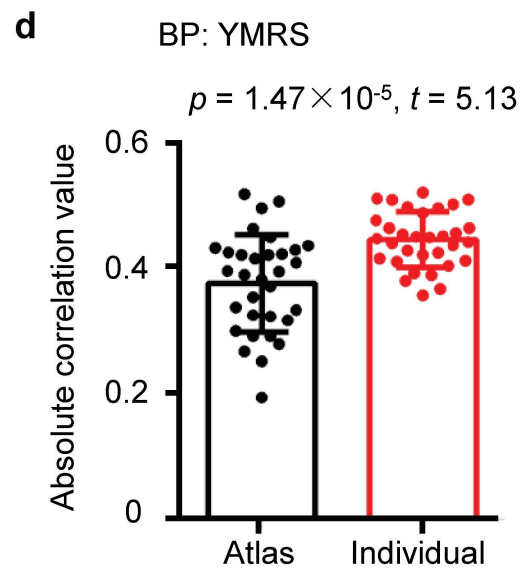

Supplement: NIHMS1503648-supplement-9.pdf [file NIHMS1503648-supplement-9.pdf]
